# Supplementary material
Source: HighWire-hosted journal article supplement (http://www.qdcxjkg.com/highwire/filestream/113243/field_highwire_adjunct_files/4/Online_supplement_figure_2.pdf)
Supplement: Online_supplement_figure_2.pdf [file Online_supplement_figure_2.pdf]

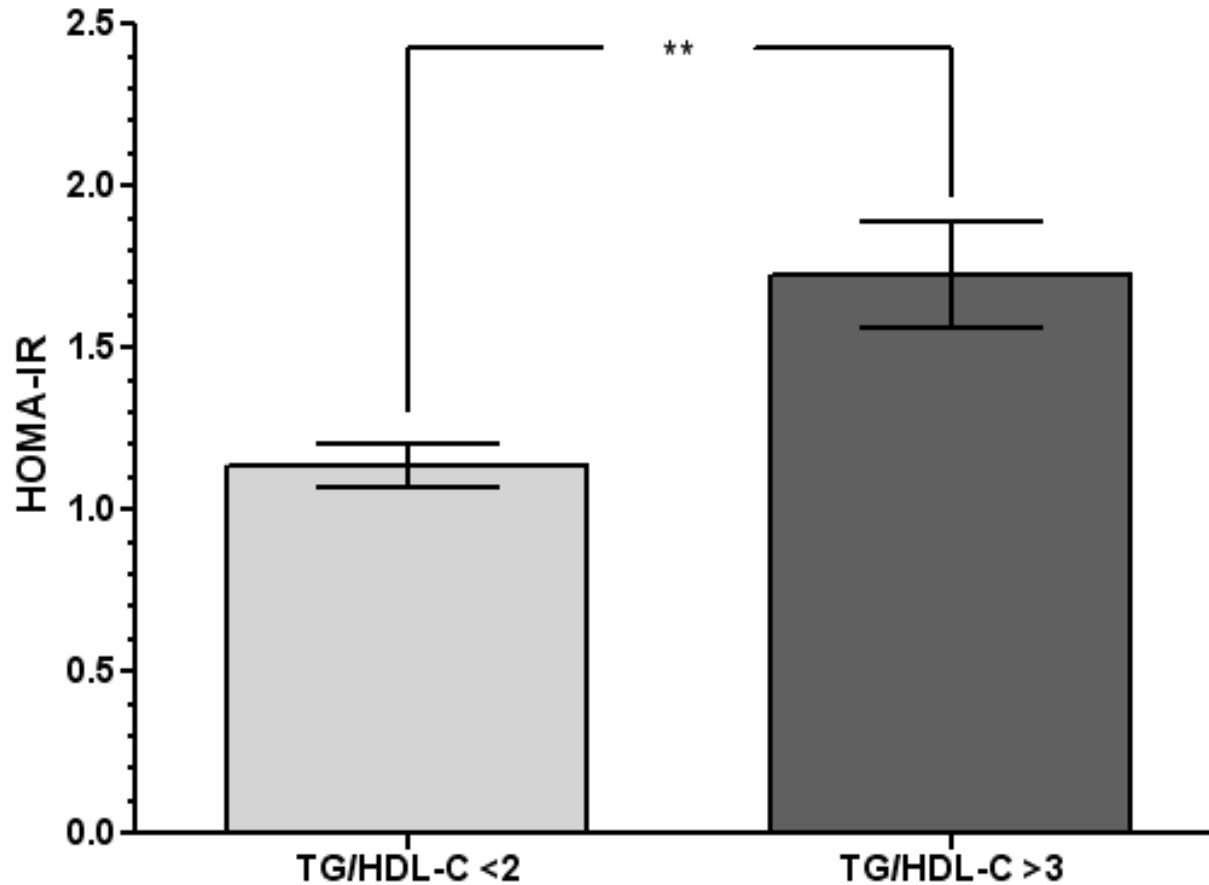

**FIGURE S2.** Determination of Insulin Resistance by TG/HDL-C is validated by HOMA-IR calculation in NHANES females with BMI<25 kg/m<sup>2</sup>. Assessment of insulin resistance by the homeostasis model (HOMA-IR) shows a significantly lower value (\*\* p<0.0001) in non-obese/non-overweight subjects deemed insulin sensitive by TG/HDL-C ratio <2 than those with TG/HDL-C > 3. HOMA-IR for TG/HDL<2=1.14±0.07 (n=218) and for TG/HDL>3=1.73±0.16 (n=40); values indicate Mean±SEM. HOMA-IR = fasting glucose (mmol/l) x fasting insulin [microU/ml]/22.5). TG/HDL-C = Triglyceride (TG) to high-density lipoprotein cholesterol (HDL-C) ratio.
